# Supplementary material for: The Use of Ultrasound for Preventing Honey Crystallization
Source: PubMed Central journal article supplement (PMC8066198; doi:10.3390/foods10040773), 2021-04-04
Supplement: foods-10-00773-s001.pdf [file foods-10-00773-s001.pdf]

**Table S1.** Supplement material – Color parameters of honey samples

| Honey variety |                           | Month | L*         | a*         | b          | Croma     | Hue angle,<br>degrees | Yellow Index |
|---------------|---------------------------|-------|------------|------------|------------|-----------|-----------------------|--------------|
| Acacia        | Control sample            | 1st   | 46.24±0.33 | -0.83±0.13 | 16.34±0.38 | 4.65±0.46 | -1.52±0.01            | 50.48±0.04   |
|               |                           | 3rd   | 46.21±0.14 | -0.79±0.22 | 16.28±0.33 | 4.62±0.31 | -1.52±0.12            | 50.33±0.14   |
|               |                           | 5th   | 46.16±0.09 | -0.74±0.31 | 16.19±0.21 | 4.57±0.04 | -1.53±0.16            | 50.10±0.12   |
|               |                           | 7th   | 46.12±0.53 | -0.72±0.09 | 16.11±0.19 | 4.52±0.09 | -1.53±0.07            | 49.90±0.18   |
|               |                           | 9th   | 46.09±0.17 | -0.69±0.48 | 16.09±0.52 | 4.51±0.16 | -1.53±0.15            | 49.87±0.33   |
|               | Ultrasound treated sample | 1st   | 46.26±0.07 | -0.83±0.16 | 16.35±0.25 | 4.66±0.04 | -1.52±0.01            | 50.49±0.06   |
|               |                           | 3rd   | 46.23±0.09 | -0.81±0.02 | 16.33±0.53 | 4.65±0.23 | -1.52±0.06            | 50.46±0.11   |
|               |                           | 5th   | 46.20±0.46 | -0.80±0.11 | 16.33±0.21 | 4.65±0.06 | -1.52±0.05            | 50.49±0.17   |
|               |                           | 7th   | 46.18±0.47 | -0.78±0.19 | 16.32±0.23 | 4.64±0.42 | -1.52±0.02            | 50.48±0.08   |
| Raspberry     | Control sample            | 1st   | 28.02±0.25 | 4.31±0.46  | 14.86±0.29 | 3.85±0.11 | 1.28±0.01             | 75.76±0.13   |
|               |                           | 3rd   | 27.11±0.01 | 3.94±0.24  | 15.27±0.03 | 4.06±0.09 | 1.31±0.21             | 80.46±0.01   |
|               |                           | 5th   | 26.78±0.53 | 3.69±0.32  | 15.63±0.11 | 4.26±0.64 | 1.33±0.47             | 83.38±0.04   |
|               |                           | 7th   | 26.43±0.19 | 3.41±0.29  | 15.97±0.21 | 4.45±0.53 | 1.36±0.04             | 86.32±0.29   |
|               |                           | 9th   | 26.04±0.30 | 3.12±0.06  | 16.25±0.07 | 4.60±0.07 | 1.38±0.19             | 89.15±0.15   |
|               | Ultrasound treated sample | 1st   | 28.34±0.29 | 4.33±0.16  | 14.84±0.47 | 3.84±0.09 | 1.28±0.09             | 74.80±0.33   |
|               |                           | 3rd   | 28.15±0.12 | 4.30±0.11  | 14.88±0.30 | 3.86±0.07 | 1.28±0.21             | 75.51±0.27   |
|               |                           | 5th   | 27.98±0.01 | 4.26±0.06  | 14.93±0.42 | 3.89±0.04 | 1.29±0.47             | 76.22±0.22   |
|               |                           | 7th   | 27.89±0.29 | 4.21±0.32  | 14.98±0.12 | 3.91±0.23 | 1.29±0.32             | 76.73±0.09   |
| Tillia        | Control sample            | 1st   | 31.97±0.30 | -0.36±0.12 | 14.94±0.63 | 3.89±0.09 | -1.55±0.16            | 66.76±0.16   |
|               |                           | 3rd   | 31.90±0.63 | -0.49±0.14 | 15.23±0.53 | 4.04±0.06 | -1.54±0.09            | 68.20±0.24   |
|               |                           | 5th   | 31.68±0.01 | -0.73±0.01 | 15.47±0.64 | 4.17±0.01 | -1.52±0.05            | 69.76±0.11   |
|               |                           | 7th   | 31.43±0.11 | -0.99±0.15 | 15.84±0.12 | 4.37±0.63 | -1.51±0.17            | 71.99±0.16   |
|               |                           | 9th   | 31.27±0.29 | -1.21±0.17 | 16.22±0.14 | 4.59±0.12 | -1.50±0.01            | 74.10±0.29   |
|               | Ultrasound treated sample | 1st   | 31.99±0.30 | -0.37±0.08 | 14.94±0.42 | 3.89±0.64 | -1.55±0.01            | 66.71±0.24   |
|               |                           | 3rd   | 31.95±0.07 | -0.39±0.01 | 14.98±0.07 | 3.91±0.07 | -1.54±0.21            | 66.98±0.13   |
|               |                           | 5th   | 31.92±0.53 | -0.46±0.07 | 15.08±0.23 | 3.96±0.09 | -1.54±0.04            | 67.49±0.08   |
|               |                           | 7th   | 31.89±0.11 | -0.52±0.03 | 15.15±0.63 | 4.00±0.30 | -1.54±0.14            | 67.86±0.27   |
| Polyfloral    | Control sample            | 1st   | 39.65±0.25 | 4.53±0.29  | 13.99±0.09 | 3.41±0.11 | 1.25±0.32             | 50.40±0.19   |
|               |                           | 3rd   | 39.33±0.39 | 4.37±0.09  | 14.24±0.11 | 3.53±0.21 | 1.27±0.04             | 51.72±0.29   |
|               |                           | 5th   | 39.12±0.01 | 4.14±0.01  | 14.47±0.63 | 3.65±0.25 | 1.29±0.09             | 52.84±0.16   |
|               |                           | 7th   | 38.87±0.30 | 4.01±0.42  | 14.95±0.04 | 3.90±0.07 | 1.30±0.71             | 54.94±0.24   |
|               |                           | 9th   | 38.56±0.38 | 3.87±0.06  | 15.12±0.29 | 3.99±0.14 | 1.32±0.38             | 56.01±0.08   |
|               | Ultrasound treated sample | 1st   | 39.79±0.38 | 4.54±0.12  | 13.95±0.21 | 3.39±0.06 | 1.25±0.04             | 50.08±0.13   |
|               |                           | 3rd   | 39.68±0.11 | 4.49±0.07  | 13.99±0.30 | 3.41±0.30 | 1.26±0.25             | 50.36±0.27   |
|               |                           | 5th   | 39.59±0.04 | 4.41±0.13  | 14.01±0.07 | 3.42±0.64 | 1.26±0.01             | 50.55±0.11   |
|               |                           | 7th   | 39.53±0.38 | 4.37±0.11  | 14.06±0.16 | 3.45±0.01 | 1.26±0.19             | 50.81±0.08   |
|               |                           | 9th   | 39.49±0.11 | 4.32±0.06  | 14.11±0.63 | 3.47±0.38 | 1.27±0.36             | 51.04±0.29   |

**Table S1.** Cont.

| Honey variety |                           | Month | L*         | a*         | b          | Croma     | Hue angle, degrees | Yellow Index |
|---------------|---------------------------|-------|------------|------------|------------|-----------|--------------------|--------------|
| Rape          | Control sample            | 1st   | 33.68±0.38 | -2.19±0.01 | 18.61±0.21 | 6.04±0.63 | -1.45±0.08         | 78.93±0.24   |
|               |                           | 3rd   | 31.28±0.22 | -3.58±0.11 | 18.01±0.22 | 5.66±0.19 | -1.37±0.01         | 82.25±0.13   |
|               |                           | 5th   | 29.83±0.04 | -4.07±0.01 | 17.14±0.07 | 5.12±0.25 | -1.34±0.05         | 82.08±0.16   |
|               |                           | 7th   | 27.58±0.63 | -4.75±0.05 | 16.06±0.15 | 4.50±0.21 | -1.28±0.06         | 83.18±0.04   |
|               |                           | 9th   | 26.06±0.07 | -5.24±0.08 | 15.12±0.32 | 3.99±0.07 | -1.24±0.01         | 83.88±0.19   |
|               | Ultrasound treated sample | 1st   | 33.70±0.53 | -2.20±0.01 | 18.60±0.29 | 6.07±0.13 | -1.46±0.08         | 78.85±0.11   |
|               |                           | 3rd   | 32.48±0.63 | -2.98±0.05 | 18.42±0.19 | 5.99±0.25 | -1.46±0.06         | 81.02±0.27   |
|               |                           | 5th   | 31.54±0.21 | -3.27±0.06 | 18.16±0.07 | 5.92±0.23 | -1.45±0.05         | 82.26±0.08   |
|               |                           | 7th   | 30.62±0.47 | -3.77±0.08 | 17.86±0.10 | 5.83±0.25 | -1.45±0.01         | 83.33±0.29   |
| Honeydew      | Control sample            | 1st   | 21.08±0.04 | 7.14±0.25  | 10.24±0.21 | 1.83±0.32 | 0.96±0.06          | 69.39±0.04   |
|               |                           | 3rd   | 19.99±0.48 | 7.29±0.48  | 10.02±0.30 | 1.75±0.06 | 0.94±0.21          | 71.60±0.27   |
|               |                           | 5th   | 18.65±0.21 | 7.74±0.10  | 9.69±0.23  | 1.63±0.13 | 0.89±0.28          | 74.22±0.13   |
|               |                           | 7th   | 17.59±0.25 | 7.94±0.07  | 9.37±0.47  | 1.53±0.29 | 0.86±0.23          | 76.09±0.24   |
|               |                           | 9th   | 16.17±0.32 | 8.17±0.21  | 9.02±0.22  | 1.42±0.25 | 0.83±0.01          | 79.69±0.19   |
|               | Ultrasound treated sample | 1st   | 21.17±0.30 | 7.09±0.10  | 10.22±0.21 | 1.82±0.12 | 0.96±0.42          | 68.96±0.11   |
|               |                           | 3rd   | 20.93±0.06 | 7.12±0.29  | 10.18±0.19 | 1.80±0.06 | 0.96±0.21          | 69.48±0.08   |
|               |                           | 5th   | 20.58±0.21 | 7.16±0.30  | 10.15±0.28 | 1.79±0.29 | 0.95±0.17          | 70.45±0.29   |
|               |                           | 7th   | 20.15±0.10 | 7.20±0.12  | 10.07±0.64 | 1.76±0.07 | 0.95±0.01          | 71.39±0.27   |
| Grassland     | Control sample            | 1st   | 34.56±0.47 | 2.11±0.53  | 12.59±0.48 | 2.76±0.25 | 1.40±0.53          | 52.04±0.11   |
|               |                           | 3rd   | 34.51±0.38 | 1.99±0.12  | 12.09±0.29 | 2.55±0.48 | 1.40±0.47          | 50.04±0.11   |
|               |                           | 5th   | 33.07±0.46 | 1.73±0.07  | 11.78±0.47 | 2.42±0.63 | 1.42±0.38          | 50.88±0.24   |
|               |                           | 7th   | 32.49±0.09 | 1.48±0.10  | 11.51±0.11 | 2.31±0.11 | 1.44±0.19          | 50.60±0.13   |
|               |                           | 9th   | 31.86±0.48 | 1.32±0.14  | 11.21±0.07 | 2.19±0.09 | 1.45±0.64          | 50.26±0.04   |
|               | Ultrasound treated sample | 1st   | 34.62±0.13 | 2.16±0.32  | 12.63±0.63 | 2.78±0.63 | 1.40±0.38          | 52.11±0.19   |
|               |                           | 3rd   | 34.49±0.63 | 2.14±0.48  | 12.51±0.11 | 2.73±0.01 | 1.40±0.09          | 51.81±0.29   |
|               |                           | 5th   | 34.36±0.01 | 2.09±0.42  | 12.33±0.21 | 2.60±0.47 | 1.40±0.19          | 51.26±0.13   |
|               |                           | 7th   | 34.12±0.53 | 2.04±0.01  | 12.18±0.23 | 2.58±0.21 | 1.40±0.23          | 50.99±0.29   |
|               |                           | 9th   | 33.92±0.48 | 2.01±0.38  | 12.05±0.06 | 2.53±0.53 | 1.40±0.12          | 50.75±0.24   |

Every value is a mean of three determinations (n = 3) ± standard deviations; L\* - degree of brightness (luminosity); a\*, b\* - color tonality.

**Table S2.** Supplement material – Texture parameters of honey samples

| Honey variety             |                           | Month          | Hardness  | Springiness | Cohesiveness | Adhesiveness | Viscosity | Chewiness | Gumminess |           |
|---------------------------|---------------------------|----------------|-----------|-------------|--------------|--------------|-----------|-----------|-----------|-----------|
| Acacia                    | Control sample            | 1st            | 0.77±0.05 | 0.31±0.07   | 1.34±0.08    | 1.37±0.11    | 0.51±0.01 | 0.14±0.03 | 0.24±0.09 |           |
|                           |                           | 3rd            | 0.79±0.01 | 0.31±0.03   | 1.34±0.11    | 1.36±0.03    | 0.55±0.12 | 0.14±0.09 | 0.25±0.07 |           |
|                           |                           | 5th            | 0.81±0.08 | 0.29±0.12   | 1.35±0.01    | 1.34±0.12    | 0.58±0.08 | 0.16±0.07 | 0.26±0.03 |           |
|                           |                           | 7th            | 0.82±0.09 | 0.28±0.03   | 1.37±0.07    | 1.33±0.08    | 0.62±0.03 | 0.17±0.08 | 0.26±0.05 |           |
|                           |                           | 9th            | 0.83±0.07 | 0.26±0.04   | 1.38±0.12    | 1.31±0.09    | 0.65±0.04 | 0.18±0.03 | 0.28±0.14 |           |
|                           | Ultrasound treated sample | 1st            | 0.76±0.03 | 0.32±0.11   | 1.34±0.05    | 1.37±0.08    | 0.51±0.01 | 0.13±0.07 | 0.24±0.01 |           |
|                           |                           | 3rd            | 0.77±0.01 | 0.33±0.09   | 1.34±0.11    | 1.38±0.01    | 0.51±0.12 | 0.13±0.12 | 0.24±0.03 |           |
|                           |                           | 5th            | 0.77±0.05 | 0.33±0.07   | 1.35±0.01    | 1.39±0.11    | 0.52±0.07 | 0.14±0.03 | 0.24±0.07 |           |
|                           |                           | 7th            | 0.78±0.09 | 0.32±0.05   | 1.35±0.11    | 1.39±0.07    | 0.53±0.04 | 0.14±0.08 | 0.24±0.05 |           |
|                           |                           | 9th            | 0.78±0.07 | 0.32±0.03   | 1.36±0.12    | 1.39±0.03    | 0.54±0.03 | 0.14±0.01 | 0.25±0.11 |           |
|                           | Raspberry                 | Control sample | 1st       | 0.92±0.08   | 0.59±0.14    | 0.89±0.03    | 1.33±0.05 | 0.54±0.12 | 0.68±0.05 | 0.82±0.09 |
|                           |                           |                | 3rd       | 0.92±0.03   | 0.59±0.07    | 0.89±0.01    | 1.33±0.07 | 0.56±0.03 | 0.62±0.09 | 0.82±0.03 |
|                           |                           |                | 5th       | 0.92±0.01   | 0.58±0.08    | 0.88±0.07    | 1.34±0.09 | 0.56±0.07 | 0.58±0.12 | 0.82±0.07 |
|                           |                           |                | 7th       | 0.92±0.11   | 0.58±0.05    | 0.88±0.11    | 1.35±0.07 | 0.58±0.01 | 0.53±0.07 | 0.81±0.01 |
| 9th                       |                           |                | 0.94±0.09 | 0.58±0.03   | 0.88±0.03    | 1.35±0.11    | 0.58±0.08 | 0.49±0.03 | 0.81±0.11 |           |
| Ultrasound treated sample |                           | 1st            | 0.92±0.07 | 0.59±0.07   | 0.89±0.09    | 1.35±0.07    | 0.54±0.07 | 0.68±0.09 | 0.82±0.05 |           |
|                           |                           | 3rd            | 0.92±0.03 | 0.58±0.12   | 0.89±0.07    | 1.33±0.01    | 0.54±0.12 | 0.68±0.12 | 0.82±0.09 |           |
|                           |                           | 5th            | 0.92±0.05 | 0.58±0.01   | 0.88±0.08    | 1.34±0.12    | 0.54±0.03 | 0.68±0.08 | 0.81±0.07 |           |
|                           |                           | 7th            | 0.92±0.11 | 0.58±0.04   | 0.88±0.01    | 1.35±0.05    | 0.54±0.12 | 0.68±0.11 | 0.81±0.01 |           |
|                           |                           | 9th            | 0.91±0.01 | 0.58±0.07   | 0.88±0.03    | 1.37±0.12    | 0.54±0.01 | 0.67±0.07 | 0.81±0.08 |           |
| Tillia                    |                           | Control sample | 1st       | 0.82±0.12   | 0.45±0.09    | 2.35±0.11    | 1.18±0.11 | 0.60±0.14 | 0.82±0.05 | 1.92±0.03 |
|                           |                           |                | 3rd       | 0.96±0.08   | 0.45±0.05    | 2.40±0.07    | 1.16±0.03 | 0.60±0.08 | 0.81±0.12 | 1.88±0.05 |
|                           |                           |                | 5th       | 0.98±0.07   | 0.44±0.07    | 2.45±0.03    | 1.16±0.07 | 0.62±0.09 | 0.80±0.14 | 1.85±0.09 |
|                           |                           |                | 7th       | 0.99±0.09   | 0.42±0.01    | 2.46±0.12    | 1.16±0.01 | 0.62±0.07 | 0.78±0.12 | 1.84±0.03 |
|                           | 9th                       |                | 1.00±0.03 | 0.40±0.08   | 2.48±0.11    | 1.14±0.12    | 0.63±0.12 | 0.77±0.03 | 1.79±0.07 |           |
|                           | Ultrasound treated sample | 1st            | 0.80±0.14 | 0.43±0.07   | 2.40±0.01    | 1.28±0.09    | 0.60±0.03 | 0.82±0.07 | 1.92±0.11 |           |
|                           |                           | 3rd            | 0.80±0.01 | 0.43±0.12   | 2.40±0.05    | 1.28±0.03    | 0.60±0.01 | 0.81±0.12 | 1.92±0.08 |           |
|                           |                           | 5th            | 0.80±0.07 | 0.42±0.03   | 2.40±0.03    | 1.29±0.01    | 0.60±0.12 | 0.81±0.05 | 1.89±0.01 |           |
|                           |                           | 7th            | 0.82±0.12 | 0.42±0.08   | 2.50±0.08    | 1.29±0.11    | 0.60±0.09 | 0.81±0.12 | 1.88±0.09 |           |
|                           |                           | 9th            | 0.82±0.09 | 0.42±0.07   | 2.50±0.03    | 1.29±0.08    | 0.62±0.05 | 0.81±0.07 | 1.88±0.07 |           |

Table S2. Cont.

| Honey variety | Month                     | Hardness | Springiness | Cohesiveness | Adhesiveness | Viscosity | Chewiness | Gumminess |           |
|---------------|---------------------------|----------|-------------|--------------|--------------|-----------|-----------|-----------|-----------|
| Polyfloral    | Control sample            | 1st      | 0.82±0.12   | 0.60±0.01    | 0.87±0.09    | 1.23±0.07 | 0.77±0.03 | 0.72±0.12 | 0.70±0.01 |
|               |                           | 3rd      | 1.00±0.03   | 0.52±0.04    | 0.97±0.14    | 1.11±0.11 | 0.94±0.08 | 0.65±0.01 | 0.59±0.08 |
|               |                           | 5th      | 1.27±0.11   | 0.40±0.09    | 1.25±0.11    | 0.98±0.05 | 1.28±0.07 | 0.59±0.07 | 0.57±0.05 |
|               |                           | 7th      | 1.36±0.05   | 0.39±0.07    | 1.47±0.08    | 0.82±0.12 | 1.36±0.04 | 0.54±0.09 | 0.54±0.09 |
|               |                           | 9th      | 1.49±0.08   | 0.39±0.03    | 1.68±0.01    | 0.70±0.09 | 1.48±0.03 | 0.49±0.12 | 0.51±0.12 |
|               | Ultrasound treated sample | 1st      | 0.82±0.09   | 0.60±0.07    | 0.86±0.11    | 1.22±0.03 | 0.74±0.09 | 0.72±0.01 | 0.70±0.03 |
|               |                           | 3rd      | 0.98±0.12   | 0.59±0.12    | 0.87±0.09    | 1.16±0.08 | 0.74±0.07 | 0.72±0.09 | 0.67±0.07 |
|               |                           | 5th      | 0.99±0.07   | 0.58±0.03    | 0.89±0.03    | 1.12±0.04 | 0.76±0.12 | 0.71±0.04 | 0.66±0.09 |
|               |                           | 7th      | 1.01±0.05   | 0.56±0.01    | 0.89±0.12    | 1.12±0.09 | 0.76±0.05 | 0.71±0.08 | 0.66±0.03 |
| Rape          | Control sample            | 1st      | 0.84±0.03   | 0.78±0.09    | 1.06±0.07    | 3.16±0.03 | 0.56±0.12 | 0.78±0.07 | 0.89±0.14 |
|               |                           | 3rd      | 1.67±0.11   | 0.71±0.07    | 1.08±0.01    | 2.81±0.09 | 0.69±0.12 | 0.84±0.09 | 1.98±0.11 |
|               |                           | 5th      | 2.12±0.01   | 0.66±0.08    | 1.12±0.11    | 2.35±0.04 | 0.83±0.07 | 0.92±0.05 | 2.29±0.09 |
|               |                           | 7th      | 2.46±0.07   | 0.56±0.03    | 1.18±0.09    | 1.96±0.09 | 0.98±0.01 | 1.04±0.04 | 2.65±0.03 |
|               |                           | 9th      | 2.83±0.08   | 0.41±0.07    | 1.29±0.12    | 1.35±0.01 | 1.27±0.04 | 1.28±0.07 | 3.02±0.08 |
|               | Ultrasound treated sample | 1st      | 0.82±0.09   | 0.77±0.08    | 1.05±0.08    | 3.18±0.07 | 0.58±0.03 | 0.77±0.01 | 0.91±0.01 |
|               |                           | 3rd      | 0.97±0.01   | 0.76±0.05    | 1.25±0.03    | 3.20±0.11 | 0.64±0.04 | 0.75±0.08 | 1.70±0.14 |
|               |                           | 5th      | 1.04±0.09   | 0.73±0.09    | 1.34±0.07    | 3.19±0.12 | 0.67±0.11 | 0.69±0.12 | 2.13±0.11 |
|               |                           | 7th      | 1.16±0.14   | 0.70±0.01    | 1.56±0.01    | 3.03±0.03 | 0.70±0.14 | 0.66±0.05 | 3.01±0.07 |
| Honeydew      | Control sample            | 1st      | 0.93±0.12   | 0.55±0.08    | 0.93±0.09    | 1.46±0.07 | 0.57±0.07 | 0.32±0.08 | 0.82±0.03 |
|               |                           | 3rd      | 0.99±0.07   | 0.51±0.03    | 0.96±0.07    | 1.40±0.08 | 0.65±0.09 | 0.45±0.12 | 0.71±0.08 |
|               |                           | 5th      | 1.08±0.08   | 0.43±0.14    | 0.99±0.07    | 1.36±0.11 | 0.79±0.11 | 0.56±0.08 | 0.64±0.07 |
|               |                           | 7th      | 1.26±0.11   | 0.38±0.04    | 1.09±0.03    | 1.32±0.04 | 0.93±0.07 | 0.71±0.11 | 0.60±0.09 |
|               |                           | 9th      | 1.43±0.05   | 0.36±0.03    | 1.17±0.04    | 1.28±0.05 | 1.36±0.05 | 0.84±0.01 | 0.49±0.05 |
|               | Ultrasound treated sample | 1st      | 0.94±0.09   | 0.55±0.08    | 0.93±0.08    | 1.45±0.07 | 0.52±0.03 | 0.31±0.07 | 0.82±0.03 |
|               |                           | 3rd      | 0.95±0.07   | 0.59±0.05    | 0.96±0.12    | 1.43±0.04 | 0.53±0.08 | 0.29±0.08 | 0.84±0.01 |
|               |                           | 5th      | 0.96±0.03   | 0.63±0.07    | 0.96±0.01    | 1.43±0.09 | 0.56±0.04 | 0.28±0.04 | 0.84±0.08 |
|               |                           | 7th      | 1.08±0.01   | 0.69±0.03    | 0.98±0.03    | 1.41±0.05 | 0.62±0.01 | 0.28±0.09 | 0.85±0.07 |
| Grassland     | Control sample            | 1st      | 1.04±0.07   | 0.31±0.12    | 0.91±0.09    | 1.62±0.11 | 0.60±0.09 | 0.33±0.12 | 0.94±0.01 |
|               |                           | 3rd      | 1.06±0.11   | 0.31±0.09    | 0.93±0.07    | 1.60±0.09 | 0.65±0.11 | 0.32±0.01 | 0.94±0.11 |
|               |                           | 5th      | 1.14±0.09   | 0.29±0.07    | 0.96±0.04    | 1.58±0.07 | 0.68±0.07 | 0.32±0.04 | 0.94±0.09 |
|               |                           | 7th      | 1.20±0.07   | 0.28±0.01    | 0.98±0.08    | 1.57±0.05 | 0.70±0.09 | 0.32±0.05 | 0.92±0.08 |
|               |                           | 9th      | 1.24±0.01   | 0.26±0.11    | 1.01±0.01    | 1.52±0.11 | 0.75±0.12 | 0.31±0.11 | 0.92±0.07 |
|               | Ultrasound treated sample | 1st      | 1.00±0.11   | 0.31±0.09    | 0.91±0.04    | 1.62±0.04 | 0.60±0.14 | 0.33±0.08 | 0.94±0.05 |
|               |                           | 3rd      | 1.00±0.03   | 0.32±0.12    | 0.93±0.03    | 1.64±0.09 | 0.60±0.04 | 0.32±0.03 | 0.98±0.03 |
|               |                           | 5th      | 1.04±0.14   | 0.32±0.03    | 0.96±0.05    | 1.68±0.04 | 0.60±0.05 | 0.32±0.07 | 1.02±0.01 |
|               |                           | 7th      | 1.04±0.07   | 0.33±0.08    | 0.98±0.07    | 1.69±0.07 | 0.60±0.08 | 0.32±0.04 | 1.04±0.09 |
|               |                           | 9th      | 1.02±0.05   | 0.33±0.07    | 1.01±0.11    | 1.70±0.03 | 0.62±0.01 | 0.32±0.09 | 1.06±0.11 |

Every value is a mean of three determinations (n = 3) ± standard deviations.

**Table S3.** Supplement material - Pearson correlation

**Table S3a.** Pearson correlation for physicochemical parameters of acacia honey

| Variables | W             | Glucose      | Fructose | Sucrose | G/F           | G/W           | ID            | HMF           | Wa     | L*            | a*           | b*            | C             | H      | YI            | Ha            | Sp            | Co           | Ad            | Vi           | Ch           | Gu |  |
|-----------|---------------|--------------|----------|---------|---------------|---------------|---------------|---------------|--------|---------------|--------------|---------------|---------------|--------|---------------|---------------|---------------|--------------|---------------|--------------|--------------|----|--|
| W         | 1             |              |          |         |               |               |               |               |        |               |              |               |               |        |               |               |               |              |               |              |              |    |  |
| Glucose   | 0.262         | 1            |          |         |               |               |               |               |        |               |              |               |               |        |               |               |               |              |               |              |              |    |  |
| Fructose  | -0.319        | -0.249       | 1        |         |               |               |               |               |        |               |              |               |               |        |               |               |               |              |               |              |              |    |  |
| Sucrose   | 0.442         | 0.620        | -0.350   | 1       |               |               |               |               |        |               |              |               |               |        |               |               |               |              |               |              |              |    |  |
| G/F       | <b>-0.931</b> | -0.161       | 0.493    | -0.470  | 1             |               |               |               |        |               |              |               |               |        |               |               |               |              |               |              |              |    |  |
| G/W       | <b>-0.978</b> | -0.094       | 0.393    | -0.371  | <b>0.961</b>  | 1             |               |               |        |               |              |               |               |        |               |               |               |              |               |              |              |    |  |
| ID        | <b>0.959</b>  | 0.085        | -0.309   | 0.398   | <b>-0.960</b> | <b>-0.976</b> | 1             |               |        |               |              |               |               |        |               |               |               |              |               |              |              |    |  |
| HMF       | <b>-0.918</b> | -0.135       | 0.531    | -0.461  | <b>0.945</b>  | <b>0.950</b>  | <b>-0.955</b> | 1             |        |               |              |               |               |        |               |               |               |              |               |              |              |    |  |
| Wa        | 0.816         | 0.207        | -0.758   | 0.500   | <b>-0.940</b> | <b>-0.869</b> | 0.839         | <b>-0.915</b> | 1      |               |              |               |               |        |               |               |               |              |               |              |              |    |  |
| L*        | -0.221        | -0.611       | 0.583    | -0.184  | 0.234         | 0.173         | -0.040        | 0.113         | -0.387 | 1             |              |               |               |        |               |               |               |              |               |              |              |    |  |
| a*        | 0.419         | <b>0.983</b> | -0.321   | 0.640   | -0.330        | -0.264        | 0.248         | -0.285        | 0.360  | -0.663        | 1            |               |               |        |               |               |               |              |               |              |              |    |  |
| b*        | -0.637        | -0.563       | 0.607    | -0.264  | 0.597         | 0.594         | -0.481        | 0.531         | -0.668 | <b>0.874</b>  | -0.678       | 1             |               |        |               |               |               |              |               |              |              |    |  |
| C         | -0.636        | -0.562       | 0.607    | -0.263  | 0.598         | 0.594         | -0.480        | 0.531         | -0.669 | <b>0.874</b>  | -0.677       | <b>1.000</b>  | 1             |        |               |               |               |              |               |              |              |    |  |
| H         | 0.408         | <b>0.987</b> | -0.280   | 0.667   | -0.313        | -0.247        | 0.242         | -0.275        | 0.333  | -0.606        | <b>0.997</b> | -0.624        | -0.623        | 1      |               |               |               |              |               |              |              |    |  |
| YI        | -0.711        | -0.531       | 0.590    | -0.274  | 0.661         | 0.671         | -0.567        | 0.611         | -0.710 | 0.813         | -0.657       | <b>0.993</b>  | <b>0.993</b>  | -0.606 | 1             |               |               |              |               |              |              |    |  |
| Ha        | 0.581         | 0.558        | -0.694   | 0.264   | -0.599        | -0.553        | 0.456         | -0.527        | 0.704  | <b>-0.889</b> | 0.671        | <b>-0.983</b> | <b>-0.984</b> | 0.615  | <b>-0.970</b> | 1             |               |              |               |              |              |    |  |
| Sp        | -0.757        | -0.625       | 0.572    | -0.502  | 0.751         | 0.703         | -0.637        | 0.656         | -0.775 | 0.770         | -0.752       | <b>0.945</b>  | <b>0.945</b>  | -0.713 | <b>0.952</b>  | <b>-0.935</b> | 1             |              |               |              |              |    |  |
| Co        | 0.287         | 0.706        | -0.407   | 0.302   | -0.211        | -0.196        | 0.056         | -0.086        | 0.302  | <b>-0.946</b> | 0.746        | <b>-0.844</b> | <b>-0.843</b> | 0.702  | -0.789        | 0.810         | -0.770        | 1            |               |              |              |    |  |
| Ad        | <b>-0.863</b> | -0.562       | 0.509    | -0.434  | 0.809         | 0.808         | -0.755        | 0.771         | -0.793 | 0.635         | -0.700       | <b>0.915</b>  | <b>0.915</b>  | -0.666 | <b>0.948</b>  | <b>-0.888</b> | <b>0.963</b>  | -0.643       | 1             |              |              |    |  |
| Vi        | 0.604         | 0.641        | -0.588   | 0.299   | -0.571        | -0.545        | 0.440         | -0.481        | 0.640  | <b>-0.900</b> | 0.746        | <b>-0.989</b> | <b>-0.989</b> | 0.696  | <b>-0.974</b> | <b>0.981</b>  | <b>-0.948</b> | <b>0.878</b> | <b>-0.899</b> | 1            |              |    |  |
| Ch        | 0.615         | 0.622        | -0.631   | 0.402   | -0.596        | -0.566        | 0.464         | -0.517        | 0.681  | <b>-0.885</b> | 0.729        | <b>-0.973</b> | <b>-0.973</b> | 0.680  | <b>-0.958</b> | <b>0.965</b>  | <b>-0.957</b> | <b>0.868</b> | <b>-0.891</b> | <b>0.972</b> | 1            |    |  |
| Gu        | 0.592         | 0.735        | -0.554   | 0.395   | -0.576        | -0.513        | 0.438         | -0.483        | 0.632  | <b>-0.858</b> | <b>0.830</b> | <b>-0.938</b> | <b>-0.938</b> | 0.789  | <b>-0.922</b> | <b>0.940</b>  | <b>-0.937</b> | 0.834        | <b>-0.896</b> | <b>0.962</b> | <b>0.930</b> | 1  |  |

W-Water Content, Glucose, Fructose, Sucrose, G/F, G/W, ID- Diastase Index, HMF- Hydroxymethylfurfural, L\*, a\*, b\*, C-Chroma, H-Hue Angle, YI- Yellow Index, Ha-Hardness, Sp-Springiness, Co-Cohesiveness, Ad-Adhesiveness, Vi-Viscosity, Ch-Chewiness, Gu-Gumminess.

**Table S3.** Supplement material - Pearson correlation

**Table S3b.** Pearson correlation for physicochemical parameters of raspberry honey

| Variables | W      | Glucose | Fructose | Sucrose | G/F    | G/W    | ID     | HMF    | Wa     | L*     | a*     | b*     | C      | H      | YI     | Ha     | Sp     | Co     | Ad     | Vi     | Ch    | Gu |  |
|-----------|--------|---------|----------|---------|--------|--------|--------|--------|--------|--------|--------|--------|--------|--------|--------|--------|--------|--------|--------|--------|-------|----|--|
| W         | 1      |         |          |         |        |        |        |        |        |        |        |        |        |        |        |        |        |        |        |        |       |    |  |
| Glucose   | -0.171 | 1       |          |         |        |        |        |        |        |        |        |        |        |        |        |        |        |        |        |        |       |    |  |
| Fructose  | 0.852  | -0.299  | 1        |         |        |        |        |        |        |        |        |        |        |        |        |        |        |        |        |        |       |    |  |
| Sucrose   | 0.853  | -0.333  | 0.896    | 1       |        |        |        |        |        |        |        |        |        |        |        |        |        |        |        |        |       |    |  |
| G/F       | -0.753 | 0.643   | -0.923   | -0.854  | 1      |        |        |        |        |        |        |        |        |        |        |        |        |        |        |        |       |    |  |
| G/W       | -1.000 | 0.178   | -0.854   | -0.855  | 0.757  | 1      |        |        |        |        |        |        |        |        |        |        |        |        |        |        |       |    |  |
| ID        | -0.876 | 0.306   | -0.945   | -0.985  | 0.881  | 0.878  | 1      |        |        |        |        |        |        |        |        |        |        |        |        |        |       |    |  |
| HMF       | -0.162 | 1.000   | -0.291   | -0.327  | 0.636  | 0.169  | 0.298  | 1      |        |        |        |        |        |        |        |        |        |        |        |        |       |    |  |
| Wa        | -0.171 | 1.000   | -0.299   | -0.333  | 0.643  | 0.178  | 0.306  | 1.000  | 1      |        |        |        |        |        |        |        |        |        |        |        |       |    |  |
| L*        | 0.466  | -0.617  | 0.593    | 0.747   | -0.725 | -0.469 | -0.694 | -0.614 | -0.617 | 1      |        |        |        |        |        |        |        |        |        |        |       |    |  |
| a*        | 0.436  | -0.701  | 0.577    | 0.689   | -0.746 | -0.440 | -0.651 | -0.698 | -0.701 | 0.981  | 1      |        |        |        |        |        |        |        |        |        |       |    |  |
| b*        | -0.434 | 0.679   | -0.579   | -0.687  | 0.739  | 0.438  | 0.651  | 0.676  | 0.679  | -0.980 | -0.999 | 1      |        |        |        |        |        |        |        |        |       |    |  |
| C         | -0.432 | 0.685   | -0.578   | -0.685  | 0.740  | 0.436  | 0.649  | 0.682  | 0.685  | -0.978 | -0.999 | 1.000  | 1      |        |        |        |        |        |        |        |       |    |  |
| H         | -0.439 | 0.686   | -0.579   | -0.692  | 0.741  | 0.442  | 0.654  | 0.683  | 0.686  | -0.984 | -1.000 | 0.999  | 0.999  | 1      |        |        |        |        |        |        |       |    |  |
| YI        | -0.449 | 0.665   | -0.589   | -0.715  | 0.740  | 0.453  | 0.672  | 0.662  | 0.665  | -0.992 | -0.997 | 0.997  | 0.996  | 0.998  | 1      |        |        |        |        |        |       |    |  |
| Ha        | -0.317 | 0.905   | -0.494   | -0.429  | 0.761  | 0.323  | 0.461  | 0.902  | 0.905  | -0.572 | -0.669 | 0.654  | 0.660  | 0.657  | 0.631  | 1      |        |        |        |        |       |    |  |
| Sp        | -0.583 | -0.218  | -0.307   | -0.218  | 0.159  | 0.581  | 0.264  | -0.224 | -0.218 | 0.331  | 0.353  | -0.369 | -0.369 | -0.357 | -0.352 | -0.094 | 1      |        |        |        |       |    |  |
| Co        | -0.302 | -0.272  | -0.209   | 0.000   | 0.058  | 0.300  | 0.101  | -0.276 | -0.272 | 0.501  | 0.494  | -0.506 | -0.505 | -0.499 | -0.503 | -0.117 | 0.802  | 1      |        |        |       |    |  |
| Ad        | 0.351  | 0.167   | 0.555    | 0.333   | -0.378 | -0.351 | -0.451 | 0.171  | 0.167  | -0.147 | -0.178 | 0.179  | 0.180  | 0.176  | 0.166  | -0.167 | -0.400 | -0.612 | 1      |        |       |    |  |
| Vi        | -0.526 | 0.583   | -0.672   | -0.750  | 0.775  | 0.529  | 0.730  | 0.579  | 0.583  | -0.961 | -0.970 | 0.971  | 0.970  | 0.972  | 0.972  | 0.607  | -0.218 | -0.357 | 0.062  | 1      |       |    |  |
| Ch        | 0.492  | -0.681  | 0.634    | 0.720   | -0.784 | -0.496 | -0.692 | -0.677 | -0.681 | 0.974  | 0.996  | -0.996 | -0.996 | -0.996 | -0.993 | -0.670 | 0.298  | 0.432  | -0.130 | -0.981 | 1     |    |  |
| Gu        | -0.512 | -0.333  | -0.384   | -0.200  | 0.174  | 0.510  | 0.300  | -0.339 | -0.333 | 0.316  | 0.345  | -0.345 | -0.347 | -0.341 | -0.335 | -0.143 | 0.655  | 0.816  | -0.667 | -0.250 | 0.279 | 1  |  |

W-Water Content, Glucose, Fructose, Sucrose, G/F, G/W, ID- Diastase Index, HMF- Hydroxymethylfurfural, L\*, a\*, b\*, C-Chroma, H-Hue Angle, YI- Yellow Index, Ha-Hardness, Sp-Springiness, Co-Cohesiveness, Ad-Adhesiveness, Vi-Viscosity, Ch-Chewiness, Gu-Gumminess.

**Table S3.** Supplement material - Pearson correlation

**Table S3c.** Pearson correlation for physicochemical parameters of tillia honey

| Variables | W      | Glucose | Fructose | Sucrose | G/F    | G/W    | ID     | HMF    | Wa     | L*     | a*     | b*     | C      | H      | YI     | Ha     | Sp     | Co     | Ad     | Vi     | Ch    | Gu |  |
|-----------|--------|---------|----------|---------|--------|--------|--------|--------|--------|--------|--------|--------|--------|--------|--------|--------|--------|--------|--------|--------|-------|----|--|
| W         | 1      |         |          |         |        |        |        |        |        |        |        |        |        |        |        |        |        |        |        |        |       |    |  |
| Glucose   | 0.729  | 1       |          |         |        |        |        |        |        |        |        |        |        |        |        |        |        |        |        |        |       |    |  |
| Fructose  | -0.383 | -0.647  | 1        |         |        |        |        |        |        |        |        |        |        |        |        |        |        |        |        |        |       |    |  |
| Sucrose   | 0.064  | -0.072  | -0.167   | 1       |        |        |        |        |        |        |        |        |        |        |        |        |        |        |        |        |       |    |  |
| G/F       | 0.667  | 0.960   | -0.834   | 0.009   | 1      |        |        |        |        |        |        |        |        |        |        |        |        |        |        |        |       |    |  |
| G/W       | -0.998 | -0.686  | 0.351    | -0.076  | -0.625 | 1      |        |        |        |        |        |        |        |        |        |        |        |        |        |        |       |    |  |
| ID        | 0.842  | 0.936   | -0.736   | -0.066  | 0.946  | -0.813 | 1      |        |        |        |        |        |        |        |        |        |        |        |        |        |       |    |  |
| HMF       | -0.888 | -0.888  | 0.672    | -0.116  | -0.888 | 0.867  | -0.955 | 1      |        |        |        |        |        |        |        |        |        |        |        |        |       |    |  |
| Wa        | 0.156  | 0.264   | -0.408   | 0.408   | 0.341  | -0.143 | 0.244  | -0.245 | 1      |        |        |        |        |        |        |        |        |        |        |        |       |    |  |
| L*        | -0.194 | -0.388  | 0.749    | -0.515  | -0.555 | 0.173  | -0.425 | 0.378  | -0.731 | 1      |        |        |        |        |        |        |        |        |        |        |       |    |  |
| a*        | -0.150 | -0.335  | 0.746    | -0.521  | -0.516 | 0.132  | -0.380 | 0.338  | -0.741 | 0.997  | 1      |        |        |        |        |        |        |        |        |        |       |    |  |
| b*        | 0.170  | 0.367   | -0.781   | 0.501   | 0.552  | -0.150 | 0.414  | -0.367 | 0.759  | -0.992 | -0.996 | 1      |        |        |        |        |        |        |        |        |       |    |  |
| C         | 0.173  | 0.369   | -0.777   | 0.504   | 0.552  | -0.153 | 0.414  | -0.369 | 0.765  | -0.992 | -0.996 | 1.000  | 1      |        |        |        |        |        |        |        |       |    |  |
| H         | 0.142  | 0.328   | -0.750   | 0.517   | 0.512  | -0.124 | 0.375  | -0.331 | 0.727  | -0.996 | -1.000 | 0.995  | 0.995  | 1      |        |        |        |        |        |        |       |    |  |
| YI        | 0.177  | 0.373   | -0.773   | 0.506   | 0.553  | -0.157 | 0.417  | -0.371 | 0.757  | -0.995 | -0.998 | 1.000  | 1.000  | 0.996  | 1      |        |        |        |        |        |       |    |  |
| Ha        | 0.647  | 0.716   | -0.912   | 0.132   | 0.852  | -0.626 | 0.851  | -0.770 | 0.442  | -0.741 | -0.723 | 0.752  | 0.750  | 0.724  | 0.749  | 1      |        |        |        |        |       |    |  |
| Sp        | 0.468  | 0.312   | 0.028    | -0.583  | 0.215  | -0.468 | 0.398  | -0.373 | -0.635 | 0.602  | 0.629  | -0.596 | -0.599 | -0.626 | -0.600 | 0.072  | 1      |        |        |        |       |    |  |
| Co        | -0.477 | -0.535  | -0.228   | 0.438   | -0.303 | 0.458  | -0.393 | 0.392  | 0.317  | -0.521 | -0.574 | 0.548  | 0.544  | 0.584  | 0.540  | 0.102  | -0.677 | 1      |        |        |       |    |  |
| Ad        | -0.738 | -0.805  | 0.871    | -0.070  | -0.902 | 0.713  | -0.920 | 0.845  | -0.434 | 0.658  | 0.632  | -0.667 | -0.667 | -0.630 | -0.666 | -0.983 | -0.175 | 0.064  | 1      |        |       |    |  |
| Vi        | 0.096  | 0.163   | -0.611   | 0.611   | 0.342  | -0.090 | 0.222  | -0.213 | 0.616  | -0.869 | -0.879 | 0.865  | 0.864  | 0.882  | 0.867  | 0.609  | -0.551 | 0.644  | -0.507 | 1      |       |    |  |
| Ch        | -0.080 | -0.361  | 0.732    | -0.470  | -0.529 | 0.054  | -0.368 | 0.297  | -0.726 | 0.986  | 0.984  | -0.981 | -0.981 | -0.983 | -0.984 | -0.685 | 0.645  | -0.524 | 0.601  | -0.823 | 1     |    |  |
| Gu        | -0.076 | -0.262  | 0.770    | -0.406  | -0.472 | 0.059  | -0.325 | 0.270  | -0.739 | 0.945  | 0.965  | -0.971 | -0.970 | -0.967 | -0.966 | -0.716 | 0.596  | -0.636 | 0.615  | -0.859 | 0.933 | 1  |  |

W-Water Content, Glucose, Fructose, Sucrose, G/F, G/W, ID- Diastase Index, HMF- Hydroxymethylfurfural, L\*, a\*, b\*, C-Chroma, H-Hue Angle, YI- Yellow Index, Ha-Hardness, Sp-Springiness, Co-Cohesiveness, Ad-Adhesiveness, Vi-Viscosity, Ch-Chewiness, Gu-Gumminess.

**Table S3.** Supplement material - Pearson correlation

**Table S3d.** Pearson correlation for physicochemical parameters of polyfloral honey

| Variables | W      | Glucose | Fructose | Sucrose | G/F    | G/W    | ID     | HMF    | Wa     | L*     | a*     | b*     | C      | H      | YI     | Ha     | Sp     | Co     | Ad     | Vi     | Ch    | Gu |  |
|-----------|--------|---------|----------|---------|--------|--------|--------|--------|--------|--------|--------|--------|--------|--------|--------|--------|--------|--------|--------|--------|-------|----|--|
| W         | 1      |         |          |         |        |        |        |        |        |        |        |        |        |        |        |        |        |        |        |        |       |    |  |
| Glucose   | 0.156  | 1       |          |         |        |        |        |        |        |        |        |        |        |        |        |        |        |        |        |        |       |    |  |
| Fructose  | 0.156  | 0.333   | 1        |         |        |        |        |        |        |        |        |        |        |        |        |        |        |        |        |        |       |    |  |
| Sucrose   | -0.116 | 0.954   | 0.318    | 1       |        |        |        |        |        |        |        |        |        |        |        |        |        |        |        |        |       |    |  |
| G/F       | 0.024  | 0.675   | -0.471   | 0.644   | 1      |        |        |        |        |        |        |        |        |        |        |        |        |        |        |        |       |    |  |
| G/W       | -0.999 | -0.122  | -0.146   | 0.149   | 0.000  | 1      |        |        |        |        |        |        |        |        |        |        |        |        |        |        |       |    |  |
| ID        | 0.102  | -0.944  | -0.281   | -0.982  | -0.663 | -0.135 | 1      |        |        |        |        |        |        |        |        |        |        |        |        |        |       |    |  |
| HMF       | -0.084 | 0.877   | 0.251    | 0.908   | 0.624  | 0.115  | -0.968 | 1      |        |        |        |        |        |        |        |        |        |        |        |        |       |    |  |
| Wa        | 0.064  | 0.816   | 0.408    | 0.779   | 0.444  | -0.035 | -0.757 | 0.696  | 1      |        |        |        |        |        |        |        |        |        |        |        |       |    |  |
| L*        | 0.344  | 0.679   | 0.711    | 0.599   | 0.079  | -0.322 | -0.541 | 0.468  | 0.851  | 1      |        |        |        |        |        |        |        |        |        |        |       |    |  |
| a*        | 0.388  | 0.562   | 0.674    | 0.480   | -0.002 | -0.371 | -0.410 | 0.331  | 0.787  | 0.981  | 1      |        |        |        |        |        |        |        |        |        |       |    |  |
| b*        | -0.282 | -0.659  | -0.688   | -0.609  | -0.077 | 0.261  | 0.551  | -0.492 | -0.824 | -0.984 | -0.968 | 1      |        |        |        |        |        |        |        |        |       |    |  |
| C         | -0.281 | -0.656  | -0.693   | -0.607  | -0.071 | 0.260  | 0.549  | -0.491 | -0.820 | -0.983 | -0.968 | 1.000  | 1      |        |        |        |        |        |        |        |       |    |  |
| H         | -0.356 | -0.603  | -0.676   | -0.530  | -0.035 | 0.337  | 0.464  | -0.390 | -0.811 | -0.989 | -0.997 | 0.985  | 0.985  | 1      |        |        |        |        |        |        |       |    |  |
| YI        | -0.297 | -0.664  | -0.701   | -0.607  | -0.073 | 0.276  | 0.549  | -0.487 | -0.831 | -0.990 | -0.974 | 0.999  | 0.999  | 0.989  | 1      |        |        |        |        |        |       |    |  |
| Ha        | -0.438 | -0.519  | -0.648   | -0.421  | 0.022  | 0.422  | 0.374  | -0.326 | -0.779 | -0.963 | -0.987 | 0.948  | 0.947  | 0.982  | 0.954  | 1      |        |        |        |        |       |    |  |
| Sp        | 0.299  | 0.692   | 0.504    | 0.633   | 0.253  | -0.276 | -0.583 | 0.514  | 0.900  | 0.945  | 0.948  | -0.935 | -0.932 | -0.953 | -0.938 | -0.946 | 1      |        |        |        |       |    |  |
| Co        | -0.278 | -0.652  | -0.728   | -0.615  | -0.040 | 0.257  | 0.567  | -0.518 | -0.806 | -0.975 | -0.962 | 0.990  | 0.990  | 0.977  | 0.990  | 0.949  | -0.936 | 1      |        |        |       |    |  |
| Ad        | 0.197  | 0.992   | 0.412    | 0.939   | 0.605  | -0.163 | -0.921 | 0.852  | 0.859  | 0.766  | 0.660  | -0.747 | -0.745 | -0.698 | -0.753 | -0.620 | 0.768  | -0.741 | 1      |        |       |    |  |
| Vi        | -0.255 | -0.738  | -0.619   | -0.700  | -0.206 | 0.231  | 0.659  | -0.602 | -0.891 | -0.964 | -0.945 | 0.966  | 0.965  | 0.960  | 0.968  | 0.936  | -0.980 | 0.977  | -0.813 | 1      |       |    |  |
| Ch        | 0.234  | 0.712   | 0.679    | 0.671   | 0.134  | -0.211 | -0.626 | 0.568  | 0.887  | 0.983  | 0.959  | -0.986 | -0.985 | -0.975 | -0.988 | -0.944 | 0.962  | -0.988 | 0.793  | -0.991 | 1     |    |  |
| Gu        | 0.289  | 0.659   | 0.596    | 0.572   | 0.150  | -0.267 | -0.525 | 0.458  | 0.916  | 0.971  | 0.954  | -0.943 | -0.940 | -0.960 | -0.951 | -0.950 | 0.954  | -0.921 | 0.742  | -0.942 | 0.960 | 1  |  |

W-Water Content, Glucose, Fructose, Sucrose, G/F, G/W, ID- Diastase Index, HMF- Hydroxymethylfurfural, L\*, a\*, b\*, C-Chroma, H-Hue Angle, YI- Yellow Index, Ha-Hardness, Sp-Springiness, Co-Cohesiveness, Ad-Adhesiveness, Vi-Viscosity, Ch-Chewiness, Gu-Gumminess.



**Table S3.** Supplement material - Pearson correlation

**Table S3e.** Pearson correlation for physicochemical parameters of rape honey

| Variables | W      | Glucose | Fructose | Sucrose | G/F    | G/W    | ID     | HMF    | Wa     | L*     | a*     | b*     | C      | H      | YI     | Ha     | Sp     | Co     | Ad     | Vi    | Ch     | Gu |  |
|-----------|--------|---------|----------|---------|--------|--------|--------|--------|--------|--------|--------|--------|--------|--------|--------|--------|--------|--------|--------|-------|--------|----|--|
| W         | 1      |         |          |         |        |        |        |        |        |        |        |        |        |        |        |        |        |        |        |       |        |    |  |
| Glucose   | 0.512  | 1       |          |         |        |        |        |        |        |        |        |        |        |        |        |        |        |        |        |       |        |    |  |
| Fructose  | 0.896  | 0.333   | 1        |         |        |        |        |        |        |        |        |        |        |        |        |        |        |        |        |       |        |    |  |
| Sucrose   | 0.128  | 0.111   | 0.333    | 1       |        |        |        |        |        |        |        |        |        |        |        |        |        |        |        |       |        |    |  |
| G/F       | -0.889 | -0.306  | -1.000   | -0.333  | 1      |        |        |        |        |        |        |        |        |        |        |        |        |        |        |       |        |    |  |
| G/W       | -1.000 | -0.510  | -0.895   | -0.130  | 0.888  | 1      |        |        |        |        |        |        |        |        |        |        |        |        |        |       |        |    |  |
| ID        | 0.879  | 0.745   | 0.756    | 0.351   | -0.740 | -0.879 | 1      |        |        |        |        |        |        |        |        |        |        |        |        |       |        |    |  |
| HMF       | -0.932 | -0.423  | -0.977   | -0.360  | 0.973  | 0.932  | -0.845 | 1      |        |        |        |        |        |        |        |        |        |        |        |       |        |    |  |
| Wa        | 0.512  | 1.000   | 0.333    | 0.111   | -0.306 | -0.510 | 0.745  | -0.423 | 1      |        |        |        |        |        |        |        |        |        |        |       |        |    |  |
| L*        | -0.283 | 0.191   | -0.386   | 0.433   | 0.396  | 0.281  | 0.140  | 0.243  | 0.191  | 1      |        |        |        |        |        |        |        |        |        |       |        |    |  |
| a*        | -0.278 | 0.159   | -0.376   | 0.502   | 0.385  | 0.275  | 0.133  | 0.226  | 0.159  | 0.987  | 1      |        |        |        |        |        |        |        |        |       |        |    |  |
| b*        | -0.410 | 0.102   | -0.480   | 0.332   | 0.488  | 0.408  | 0.010  | 0.365  | 0.102  | 0.975  | 0.937  | 1      |        |        |        |        |        |        |        |       |        |    |  |
| C         | -0.596 | -0.110  | -0.617   | 0.274   | 0.619  | 0.594  | -0.220 | 0.530  | -0.110 | 0.915  | 0.881  | 0.971  | 1      |        |        |        |        |        |        |       |        |    |  |
| H         | 0.755  | 0.266   | 0.747    | -0.239  | -0.746 | -0.753 | 0.427  | -0.686 | 0.266  | -0.824 | -0.808 | -0.890 | -0.968 | 1      |        |        |        |        |        |       |        |    |  |
| YI        | -0.173 | -0.411  | -0.002   | -0.585  | -0.011 | 0.176  | -0.489 | 0.182  | -0.411 | -0.780 | -0.839 | -0.623 | -0.486 | 0.388  | 1      |        |        |        |        |       |        |    |  |
| Ha        | 0.651  | 0.104   | 0.678    | -0.334  | -0.682 | -0.649 | 0.272  | -0.588 | 0.104  | -0.905 | -0.900 | -0.938 | -0.975 | 0.979  | 0.544  | 1      |        |        |        |       |        |    |  |
| Sp        | -0.437 | -0.012  | -0.483   | 0.322   | 0.488  | 0.434  | -0.047 | 0.383  | -0.012 | 0.944  | 0.905  | 0.983  | 0.972  | -0.904 | -0.561 | -0.928 | 1      |        |        |       |        |    |  |
| Co        | -0.953 | -0.553  | -0.940   | -0.357  | 0.933  | 0.953  | -0.922 | 0.985  | -0.553 | 0.148  | 0.136  | 0.279  | 0.471  | -0.645 | 0.280  | -0.525 | 0.309  | 1      |        |       |        |    |  |
| Ad        | -0.595 | -0.049  | -0.631   | 0.256   | 0.635  | 0.593  | -0.200 | 0.546  | -0.049 | 0.913  | 0.875  | 0.973  | 0.993  | -0.960 | -0.477 | -0.974 | 0.973  | 0.474  | 1      |       |        |    |  |
| Vi        | 0.473  | 0.057   | 0.494    | -0.334  | -0.497 | -0.471 | 0.090  | -0.397 | 0.057  | -0.935 | -0.901 | -0.977 | -0.979 | 0.918  | 0.540  | 0.938  | -0.995 | -0.333 | -0.976 | 1     |        |    |  |
| Ch        | 0.786  | 0.350   | 0.720    | -0.101  | -0.716 | -0.785 | 0.499  | -0.697 | 0.350  | -0.699 | -0.652 | -0.820 | -0.921 | 0.949  | 0.146  | 0.885  | -0.868 | -0.677 | -0.919 | 0.887 | 1      |    |  |
| Gu        | -0.654 | -0.596  | -0.542   | -0.613  | 0.529  | 0.656  | -0.884 | 0.681  | -0.596 | -0.498 | -0.526 | -0.340 | -0.134 | -0.052 | 0.809  | 0.119  | -0.290 | 0.762  | -0.135 | 0.261 | -0.203 | 1  |  |

W-Water Content, Glucose, Fructose, Sucrose, G/F, G/W, ID- Diastase Index, HMF- Hydroxymethylfurfural, L\*, a\*, b\*, C-Chroma, H-Hue Angle, YI- Yellow Index, Ha-Hardness, Sp-Springiness, Co-Cohesiveness, Ad-Adhesiveness, Vi-Viscosity, Ch-Chewiness, Gu-Gumminess.

**Table S3.** Supplement material - Pearson correlation

**Table S3f.** Pearson correlation for physicochemical parameters of honeydew honey

| Variables | W      | Glucose | Fructose | Sucrose | G/F    | G/W    | ID     | HMF    | Wa     | L*     | a*     | b*     | C      | H      | YI     | Ha     | Sp     | Co     | Ad     | Vi     | Ch     | Gu |  |
|-----------|--------|---------|----------|---------|--------|--------|--------|--------|--------|--------|--------|--------|--------|--------|--------|--------|--------|--------|--------|--------|--------|----|--|
| W         | 1      |         |          |         |        |        |        |        |        |        |        |        |        |        |        |        |        |        |        |        |        |    |  |
| Glucose   | 0.697  | 1       |          |         |        |        |        |        |        |        |        |        |        |        |        |        |        |        |        |        |        |    |  |
| Fructose  | -0.697 | -1.000  | 1        |         |        |        |        |        |        |        |        |        |        |        |        |        |        |        |        |        |        |    |  |
| Sucrose   | -0.100 | -0.333  | 0.333    | 1       |        |        |        |        |        |        |        |        |        |        |        |        |        |        |        |        |        |    |  |
| G/F       | 0.697  | 1.000   | -1.000   | -0.333  | 1      |        |        |        |        |        |        |        |        |        |        |        |        |        |        |        |        |    |  |
| G/W       | -1.000 | -0.689  | 0.689    | 0.097   | -0.689 | 1      |        |        |        |        |        |        |        |        |        |        |        |        |        |        |        |    |  |
| ID        | 0.769  | 0.693   | -0.693   | -0.148  | 0.693  | -0.771 | 1      |        |        |        |        |        |        |        |        |        |        |        |        |        |        |    |  |
| HMF       | -0.823 | -0.897  | 0.897    | 0.272   | -0.897 | 0.820  | -0.932 | 1      |        |        |        |        |        |        |        |        |        |        |        |        |        |    |  |
| Wa        | 0.244  | 0.816   | -0.816   | -0.408  | 0.816  | -0.237 | 0.544  | -0.696 | 1      |        |        |        |        |        |        |        |        |        |        |        |        |    |  |
| L*        | 0.000  | -0.574  | 0.574    | 0.729   | -0.574 | -0.008 | -0.157 | 0.365  | -0.779 | 1      |        |        |        |        |        |        |        |        |        |        |        |    |  |
| a*        | 0.142  | 0.664   | -0.664   | -0.684  | 0.664  | -0.136 | 0.322  | -0.508 | 0.826  | -0.979 | 1      |        |        |        |        |        |        |        |        |        |        |    |  |
| b*        | -0.055 | -0.584  | 0.584    | 0.751   | -0.584 | 0.049  | -0.228 | 0.416  | -0.778 | 0.994  | -0.987 | 1      |        |        |        |        |        |        |        |        |        |    |  |
| C         | -0.050 | -0.586  | 0.586    | 0.741   | -0.586 | 0.043  | -0.225 | 0.415  | -0.783 | 0.995  | -0.988 | 1.000  | 1      |        |        |        |        |        |        |        |        |    |  |
| H         | -0.106 | -0.630  | 0.630    | 0.720   | -0.630 | 0.100  | -0.282 | 0.470  | -0.805 | 0.989  | -0.997 | 0.996  | 0.997  | 1      |        |        |        |        |        |        |        |    |  |
| YI        | -0.021 | 0.557   | -0.557   | -0.750  | 0.557  | 0.028  | 0.116  | -0.334 | 0.758  | -0.998 | 0.967  | -0.987 | -0.988 | -0.979 | 1      |        |        |        |        |        |        |    |  |
| Ha        | -0.052 | 0.443   | -0.443   | -0.782  | 0.443  | 0.058  | 0.021  | -0.232 | 0.639  | -0.969 | 0.924  | -0.968 | -0.967 | -0.947 | 0.972  | 1      |        |        |        |        |        |    |  |
| Sp        | -0.526 | -0.814  | 0.814    | 0.520   | -0.814 | 0.523  | -0.785 | 0.864  | -0.849 | 0.722  | -0.832 | 0.773  | 0.772  | 0.809  | -0.688 | -0.617 | 1      |        |        |        |        |    |  |
| Co        | -0.021 | 0.457   | -0.457   | -0.807  | 0.457  | 0.026  | 0.112  | -0.289 | 0.649  | -0.961 | 0.928  | -0.972 | -0.969 | -0.952 | 0.959  | 0.984  | -0.672 | 1      |        |        |        |    |  |
| Ad        | 0.058  | -0.547  | 0.547    | 0.693   | -0.547 | -0.065 | -0.152 | 0.346  | -0.804 | 0.992  | -0.971 | 0.987  | 0.988  | 0.981  | -0.986 | -0.957 | 0.721  | -0.954 | 1      |        |        |    |  |
| Vi        | 0.122  | 0.582   | -0.582   | -0.872  | 0.582  | -0.116 | 0.229  | -0.424 | 0.716  | -0.965 | 0.947  | -0.974 | -0.971 | -0.964 | 0.968  | 0.961  | -0.742 | 0.967  | -0.943 | 1      |        |    |  |
| Ch        | 0.277  | 0.743   | -0.743   | -0.699  | 0.743  | -0.271 | 0.485  | -0.647 | 0.875  | -0.935 | 0.974  | -0.959 | -0.958 | -0.970 | 0.917  | 0.874  | -0.915 | 0.899  | -0.931 | 0.934  | 1      |    |  |
| Gu        | -0.286 | -0.768  | 0.768    | 0.698   | -0.768 | 0.281  | -0.519 | 0.677  | -0.908 | 0.920  | -0.961 | 0.939  | 0.939  | 0.954  | -0.904 | -0.840 | 0.922  | -0.862 | 0.917  | -0.921 | -0.993 | 1  |  |

W-Water Content, Glucose, Fructose, Sucrose, G/F, G/W, ID- Diastase Index, HMF- Hydroxymethylfurfural, L\*, a\*, b\*, C-Chroma, H-Hue Angle, YI- Yellow Index, Ha-Hardness, Sp-Springiness, Co-Cohesiveness, Ad-Adhesiveness, Vi-Viscosity, Ch-Chewiness, Gu-Gumminess.

**Table S3.** Supplement material - Pearson correlation

**Table S3g.** Pearson correlation for physicochemical parameters of grassland honey

| Variables | W      | Glucose | Fructose | Sucrose | G/F    | G/W    | ID     | HMF    | Wa     | L*     | a*     | b*     | C      | H      | YI     | Ha     | Sp     | Co     | Ad     | Vi     | Ch    | Gu |  |
|-----------|--------|---------|----------|---------|--------|--------|--------|--------|--------|--------|--------|--------|--------|--------|--------|--------|--------|--------|--------|--------|-------|----|--|
| W         | 1      |         |          |         |        |        |        |        |        |        |        |        |        |        |        |        |        |        |        |        |       |    |  |
| Glucose   | 0.250  | 1       |          |         |        |        |        |        |        |        |        |        |        |        |        |        |        |        |        |        |       |    |  |
| Fructose  | -0.660 | 0.258   | 1        |         |        |        |        |        |        |        |        |        |        |        |        |        |        |        |        |        |       |    |  |
| Sucrose   | -0.500 | -0.125  | 0.330    | 1       |        |        |        |        |        |        |        |        |        |        |        |        |        |        |        |        |       |    |  |
| G/F       | 0.688  | -0.192  | -0.998   | -0.344  | 1      |        |        |        |        |        |        |        |        |        |        |        |        |        |        |        |       |    |  |
| G/W       | -1.000 | -0.222  | 0.673    | 0.500   | -0.699 | 1      |        |        |        |        |        |        |        |        |        |        |        |        |        |        |       |    |  |
| ID        | 0.599  | -0.067  | -0.811   | -0.300  | 0.819  | -0.605 | 1      |        |        |        |        |        |        |        |        |        |        |        |        |        |       |    |  |
| HMF       | -0.648 | 0.068   | 0.892    | 0.297   | -0.901 | 0.655  | -0.969 | 1      |        |        |        |        |        |        |        |        |        |        |        |        |       |    |  |
| Wa        | -0.500 | -0.125  | 0.330    | 1.000   | -0.344 | 0.500  | -0.300 | 0.297  | 1      |        |        |        |        |        |        |        |        |        |        |        |       |    |  |
| L*        | -0.571 | -0.339  | 0.511    | 0.694   | -0.542 | 0.564  | -0.409 | 0.440  | 0.694  | 1      |        |        |        |        |        |        |        |        |        |        |       |    |  |
| a*        | -0.704 | -0.345  | 0.601    | 0.695   | -0.635 | 0.699  | -0.493 | 0.535  | 0.695  | 0.984  | 1      |        |        |        |        |        |        |        |        |        |       |    |  |
| b*        | -0.695 | -0.485  | 0.523    | 0.666   | -0.565 | 0.686  | -0.378 | 0.439  | 0.666  | 0.955  | 0.975  | 1      |        |        |        |        |        |        |        |        |       |    |  |
| C         | -0.693 | -0.494  | 0.518    | 0.656   | -0.561 | 0.683  | -0.371 | 0.434  | 0.656  | 0.951  | 0.972  | 1.000  | 1      |        |        |        |        |        |        |        |       |    |  |
| H         | 0.701  | 0.287   | -0.617   | -0.711  | 0.647  | -0.697 | 0.526  | -0.560 | -0.711 | -0.982 | -0.996 | -0.953 | -0.948 | 1      |        |        |        |        |        |        |       |    |  |
| YI        | -0.739 | -0.635  | 0.376    | 0.393   | -0.426 | 0.725  | -0.186 | 0.293  | 0.393  | 0.539  | 0.632  | 0.765  | 0.772  | -0.573 | 1      |        |        |        |        |        |       |    |  |
| Ha        | 0.711  | 0.346   | -0.643   | -0.664  | 0.677  | -0.705 | 0.544  | -0.608 | -0.664 | -0.962 | -0.985 | -0.956 | -0.953 | 0.982  | -0.626 | 1      |        |        |        |        |       |    |  |
| Sp        | -0.693 | -0.069  | 0.786    | 0.711   | -0.803 | 0.696  | -0.743 | 0.779  | 0.711  | 0.876  | 0.909  | 0.819  | 0.811  | -0.932 | 0.426  | -0.928 | 1      |        |        |        |       |    |  |
| Co        | 0.212  | 0.566   | 0.146    | -0.495  | -0.108 | -0.197 | -0.342 | 0.306  | -0.495 | -0.675 | -0.618 | -0.716 | -0.719 | 0.577  | -0.566 | 0.537  | -0.275 | 1      |        |        |       |    |  |
| Ad        | -0.724 | 0.014   | 0.875    | 0.629   | -0.888 | 0.730  | -0.891 | 0.905  | 0.629  | 0.727  | 0.790  | 0.693  | 0.685  | -0.817 | 0.392  | -0.820 | 0.954  | -0.039 | 1      |        |       |    |  |
| Vi        | 0.760  | 0.304   | -0.715   | -0.722  | 0.748  | -0.757 | 0.622  | -0.668 | -0.722 | -0.931 | -0.971 | -0.949 | -0.945 | 0.967  | -0.675 | 0.965  | -0.942 | 0.495  | -0.879 | 1      |       |    |  |
| Ch        | -0.500 | -0.750  | 0.048    | 0.750   | -0.102 | 0.481  | -0.155 | 0.153  | 0.750  | 0.689  | 0.693  | 0.767  | 0.767  | -0.665 | 0.685  | -0.673 | 0.520  | -0.707 | 0.410  | -0.684 | 1     |    |  |
| Gu        | -0.650 | 0.232   | 0.912    | 0.371   | -0.910 | 0.661  | -0.954 | 0.966  | 0.371  | 0.484  | 0.568  | 0.435  | 0.427  | -0.607 | 0.186  | -0.622 | 0.824  | 0.289  | 0.934  | -0.675 | 0.093 | 1  |  |

W-Water Content, Glucose, Fructose, Sucrose, G/F, G/W, ID- Diastase Index, HMF- Hydroxymethylfurfural, L\*, a\*, b\*, C-Chroma, H-Hue Angle, YI- Yellow Index, Ha-Hardness, Sp-Springiness, Co-Cohesiveness, Ad-Adhesiveness, Vi-Viscosity, Ch-Chewiness, Gu-Gumminess.
